# Supplementary material for: NGS-based Molecular diagnosis of 105 eyeGENE® probands with Retinitis Pigmentosa
Source: PubMed Central journal article supplement (PMC4678898; doi:10.1038/srep18287), 2015-12-15
Supplement: srep18287-s1.pdf [file srep18287-s1.pdf]

## Supplementary Information

### NGS-based Molecular diagnosis of 105 eyeGENE<sup>®</sup> probands with Retinitis

#### Pigmentosa

Zhongqi Ge<sup>1,2</sup>, Kristen Bowles<sup>4</sup>, Kerry Goetz<sup>3</sup>, Hendrik P. N. Scholl<sup>4</sup>, Feng Wang<sup>1,2</sup>,  
Xinjing Wang<sup>3</sup>, Shan Xu<sup>1</sup>, Keqing Wang<sup>2</sup>, Hui Wang<sup>1,2</sup>, Rui Chen<sup>1,2,5,6,7\*</sup>

<sup>1</sup>*Human Genome Sequencing Center, Baylor College of Medicine, Houston, Texas, USA*

<sup>2</sup>*Department of Molecular and Human Genetics, Baylor College of Medicine, Houston, Texas, USA*

<sup>3</sup>*Ophthalmic Genetics and Visual Function Branch, National Eye Institute/National Institutes of Health, Bethesda, Maryland, USA*

<sup>4</sup>*Wilmer Eye Institute, Johns Hopkins University, Baltimore, Maryland, USA*

<sup>5</sup>*Program in Developmental Biology, Baylor College of Medicine, Houston, Texas, USA*

<sup>6</sup>*The Verna and Marrs Mclean Department of Biochemistry and Molecular Biology, Baylor College of Medicine, Houston, Texas, USA*

<sup>7</sup>*Structural and Computational Biology and molecular Biophysics Graduate Program, Baylor College of Medicine, Houston, Texas, USA*

Correspondence: Rui Chen, 1 Baylor Plaza, Room N1519, Baylor College of Medicine, Houston, TX 77030, USA

ruichen@bcm.edu

**Supplemental Table 1 Genes in our retinal capture panel**

| <b>All genes in the panel</b> | <b>RP genes in the panel</b> | <b>Inheritance mode of RP genes</b> |
|-------------------------------|------------------------------|-------------------------------------|
| <i>ABCA4</i>                  | <i>ABCA4</i>                 | recessive                           |
| <i>ABCC6</i>                  | <i>BBS1</i>                  | recessive                           |
| <i>ABHD12</i>                 | <i>BEST1</i>                 | recessive/dominant                  |
| <i>ADAM9</i>                  | <i>C2orf71</i>               | recessive                           |
| <i>TREX1</i>                  | <i>C8orf37</i>               | recessive                           |
| <i>AHI1</i>                   | <i>CA4</i>                   | dominant                            |
| <i>AIPL1</i>                  | <i>CC2D2A</i>                | recessive                           |
| <i>ALMS1</i>                  | <i>CERKL</i>                 | recessive                           |
| <i>ARL6</i>                   | <i>CLRN1</i>                 | recessive                           |
| <i>ARMS2</i>                  | <i>CNGA1</i>                 | recessive                           |
| <i>ATXN7</i>                  | <i>CNGB1</i>                 | recessive                           |
| <i>BBS1</i>                   | <i>CRB1</i>                  | recessive                           |
| <i>BBS10</i>                  | <i>CRX</i>                   | dominant                            |
| <i>BBS12</i>                  | <i>DHDDS</i>                 | recessive                           |
| <i>BBS2</i>                   | <i>EYS</i>                   | recessive                           |
| <i>BBS4</i>                   | <i>FAM161A</i>               | recessive                           |
| <i>BBS5</i>                   | <i>FLVCR1</i>                | recessive                           |
| <i>BBS7</i>                   | <i>FSCN2</i>                 | dominant                            |
| <i>BBS9</i>                   | <i>GNPTG</i>                 | recessive                           |
| <i>BEST1</i>                  | <i>GUCA1B</i>                | dominant                            |
| <i>C1QTNF5</i>                | <i>IDH3B</i>                 | recessive                           |
| <i>C2</i>                     | <i>IMPDH1</i>                | dominant                            |
| <i>C2orf71</i>                | <i>IMPG2</i>                 | recessive                           |
| <i>C3</i>                     | <i>KLHL7</i>                 | dominant                            |
| <i>C8orf37</i>                | <i>LRAT</i>                  | recessive                           |
| <i>CA4</i>                    | <i>MAK</i>                   | recessive                           |
| <i>CABP4</i>                  | <i>MERTK</i>                 | recessive                           |
| <i>CACNA1F</i>                | <i>NR2E3</i>                 | recessive/dominant                  |
| <i>CACNA2D4</i>               | <i>NRL</i>                   | recessive/dominant                  |
| <i>CC2D2A</i>                 | <i>OFD1</i>                  | X-linked                            |
| <i>CDH23</i>                  | <i>PDE6A</i>                 | recessive                           |
| <i>CDH3</i>                   | <i>PDE6B</i>                 | recessive                           |
| <i>CDHR1</i>                  | <i>PDE6G</i>                 | recessive                           |
| <i>CEP164</i>                 | <i>PRCD</i>                  | recessive                           |
| <i>CEP290</i>                 | <i>PROM1</i>                 | recessive                           |
| <i>CERKL</i>                  | <i>PRPF3</i>                 | dominant                            |

|                |                 |                    |
|----------------|-----------------|--------------------|
| <i>CFB</i>     | <i>PRPF31</i>   | dominant           |
| <i>CFH</i>     | <i>PRPF6</i>    | dominant           |
| <i>CHM</i>     | <i>PRPF8</i>    | dominant           |
| <i>CLN3</i>    | <i>PRPH2</i>    | dominant           |
| <i>CLRN1</i>   | <i>RBP3</i>     | recessive          |
| <i>CNGA1</i>   | <i>RDH12</i>    | dominant           |
| <i>CNGA3</i>   | <i>RGR</i>      | recessive          |
| <i>CNGB1</i>   | <i>RHO</i>      | recessive/dominant |
| <i>CNGB3</i>   | <i>RLBP1</i>    | recessive          |
| <i>CNNM4</i>   | <i>ROM1</i>     | dominant           |
| <i>COL11A1</i> | <i>RP1</i>      | recessive/dominant |
| <i>COL2A1</i>  | <i>RP2</i>      | X-linked           |
| <i>COL9A1</i>  | <i>RP8</i>      | dominant           |
| <i>CRB1</i>    | <i>RP9</i>      | dominant           |
| <i>CRX</i>     | <i>RPE65</i>    | recessive/dominant |
| <i>CYP4V2</i>  | <i>RPGR</i>     | X-linked           |
| <i>DFNB31</i>  | <i>SAG</i>      | recessive          |
| <i>DHDDS</i>   | <i>SEMA4A</i>   | dominant           |
| <i>DMD</i>     | <i>SNRNP200</i> | dominant           |
| <i>EFEMP1</i>  | <i>SPATA7</i>   | recessive          |
| <i>ELOVL4</i>  | <i>TOPORS</i>   | dominant           |
| <i>ERCC6</i>   | <i>TTC8</i>     | recessive          |
| <i>EYS</i>     | <i>TTPA</i>     | recessive          |
| <i>FAM161A</i> | <i>TULP1</i>    | recessive          |
| <i>FBLN5</i>   | <i>USH2A</i>    | recessive          |
| <i>FLVCR1</i>  |                 |                    |
| <i>FSCN2</i>   |                 |                    |
| <i>FZD4</i>    |                 |                    |
| <i>GNAT1</i>   |                 |                    |
| <i>GNAT2</i>   |                 |                    |
| <i>GNPTG</i>   |                 |                    |
| <i>GPR179</i>  |                 |                    |
| <i>GPR98</i>   |                 |                    |
| <i>GRK1</i>    |                 |                    |
| <i>GRM6</i>    |                 |                    |
| <i>GUCA1A</i>  |                 |                    |
| <i>GUCA1B</i>  |                 |                    |
| <i>GUCY2D</i>  |                 |                    |
| <i>HMCN1</i>   |                 |                    |

|        |  |  |
|--------|--|--|
| HTRA1  |  |  |
| IDH3B  |  |  |
| IFT140 |  |  |
| IMPDH1 |  |  |
| IMPG2  |  |  |
| INPP5E |  |  |
| INVS   |  |  |
| IQCB1  |  |  |
| JAG1   |  |  |
| KCNJ13 |  |  |
| KCNV2  |  |  |
| KIF11  |  |  |
| KLHL7  |  |  |
| LCA5   |  |  |
| LRAT   |  |  |
| LRP5   |  |  |
| MAK    |  |  |
| MERTK  |  |  |
| MFN2   |  |  |
| MFRP   |  |  |
| MKKS   |  |  |
| MKS1   |  |  |
| MTTP   |  |  |
| MYO7A  |  |  |
| NDP    |  |  |
| NMNAT1 |  |  |
| NPHP1  |  |  |
| NPHP3  |  |  |
| NPHP4  |  |  |
| NR2E3  |  |  |
| NRL    |  |  |
| NYX    |  |  |
| OAT    |  |  |
| OFD1   |  |  |
| OPA1   |  |  |
| OPA3   |  |  |
| OPN1LW |  |  |
| OPN1MW |  |  |
| OPN1SW |  |  |

|                |  |  |
|----------------|--|--|
| <i>OTX2</i>    |  |  |
| <i>PANK2</i>   |  |  |
| <i>PAX2</i>    |  |  |
| <i>PCDH15</i>  |  |  |
| <i>PDE6A</i>   |  |  |
| <i>PDE6B</i>   |  |  |
| <i>PDE6C</i>   |  |  |
| <i>PDE6G</i>   |  |  |
| <i>PDZD7</i>   |  |  |
| <i>PEX1</i>    |  |  |
| <i>PEX2</i>    |  |  |
| <i>PEX7</i>    |  |  |
| <i>PGK1</i>    |  |  |
| <i>PHYH</i>    |  |  |
| <i>PITPNM3</i> |  |  |
| <i>PLA2G5</i>  |  |  |
| <i>PRCD</i>    |  |  |
| <i>PRD</i>     |  |  |
| <i>PROM1</i>   |  |  |
| <i>PRPF3</i>   |  |  |
| <i>PRPF31</i>  |  |  |
| <i>PRPF6</i>   |  |  |
| <i>PRPF8</i>   |  |  |
| <i>PRPH2</i>   |  |  |
| <i>PXMP3</i>   |  |  |
| <i>RAX2</i>    |  |  |
| <i>RB1</i>     |  |  |
| <i>RBP3</i>    |  |  |
| <i>RBP4</i>    |  |  |
| <i>RCD1</i>    |  |  |
| <i>RD3</i>     |  |  |
| <i>RDH12</i>   |  |  |
| <i>RDH5</i>    |  |  |
| <i>RGR</i>     |  |  |
| <i>RGS9</i>    |  |  |
| <i>RGS9BP</i>  |  |  |
| <i>RHO</i>     |  |  |
| <i>RIMS1</i>   |  |  |
| <i>RLBP1</i>   |  |  |

|          |  |  |
|----------|--|--|
| ROM1     |  |  |
| RP1      |  |  |
| RP1L1    |  |  |
| RP2      |  |  |
| RP8      |  |  |
| RP9      |  |  |
| RPE65    |  |  |
| RPGR     |  |  |
| RPGRIP1  |  |  |
| RPGRIP1L |  |  |
| RS1      |  |  |
| SAG      |  |  |
| SDCCAG8  |  |  |
| SEMA4A   |  |  |
| SLC24A1  |  |  |
| SNRNP200 |  |  |
| SPATA7   |  |  |
| TEAD1    |  |  |
| TIMM8A   |  |  |
| TIMP3    |  |  |
| TLR3     |  |  |
| TLR4     |  |  |
| TMEM126A |  |  |
| TMEM237  |  |  |
| TOPORS   |  |  |
| TREX1    |  |  |
| TRIM32   |  |  |
| TRPM1    |  |  |
| TSPAN12  |  |  |
| TTC8     |  |  |
| TTPA     |  |  |
| TULP1    |  |  |
| UNC119   |  |  |
| USH1C    |  |  |
| USH1G    |  |  |
| USH2A    |  |  |
| VCAN     |  |  |
| WDPCP    |  |  |
| WDR19    |  |  |

|              |  |  |
|--------------|--|--|
| <i>WFS1</i>  |  |  |
| <i>WDPCP</i> |  |  |
| <i>WDR19</i> |  |  |

**Supplemental Table 2 Genes screened for 16 probands before NGS-based sequencing**

| <b>Sample</b> | <b>Genes Screened</b>                                                    |
|---------------|--------------------------------------------------------------------------|
| RC+V.27       | <i>RP2, RPGR</i>                                                         |
| 3H5+K.42      | <i>IMPDH1, KLHL7, NR2E3, PRPF3, PRPF31, PRPF8, RDS, RHO, RP1, RP2</i>    |
| 3HV+M.66      | <i>IMPDH1, KLHL7, NR2E3, PRPF3, PRPF31, PRPF8, RDS, RHO, RP1, RP2</i>    |
| 3WP+3.68      | <i>IMPDH1, KLHL7, NR2E3, PRPF3, PRPF31, PRPF8, RDS, RHO, RP1, TOPORS</i> |
| 3JY+V.17      | <i>RP2, RPGR</i>                                                         |
| 3JE+8.28      | <i>RP2, RPGR</i>                                                         |
| 5H3+9.73      | <i>RP2, RPGR</i>                                                         |
| UY2+R.10      | <i>CDH23, CLRN1, DFNB31, GPR98, MYO7A, PCDH15, USH1C, USH1G, USH2A</i>   |
| 5EF+L.58      | <i>IMPDH1, KLHL7, NR2E3, PRPF3, PRPF31, PRPF8, RDS, RHO, RP1, TOPORS</i> |
| 5WG+V.72      | <i>IMPDH1, KLHL7, NR2E3, PRPF3, PRPF31, PRPF8, RDS, RHO, RP1, RP2</i>    |
| LA+X.61       | <i>RDS</i>                                                               |
| 3W5+K.90      | <i>IMPDH1, KLHL7, NR2E3, PRPF3, PRPF31, PRPF8, RDS, RHO, RP1, RP2</i>    |
| 375+8.59      | <i>IMPDH1, KLHL7, NR2E3, PRPF3, PRPF31, PRPF8, RDS, RHO, RP1, RP2</i>    |
| 3VU+9.42      | <i>IMPDH1, KLHL7, NR2E3, PRPF3, PRPF31, PRPF8, RDS, RHO, RP1, TOPORS</i> |
| 3VF+9.12      | <i>IMPDH1, KLHL7, NR2E3, PRPF3, PRPF31, PRPF8, RDS, RHO, RP1, TOPORS</i> |
| UPF+S.24      | <i>ABCA4</i>                                                             |



## **Figure Legends**

Supplemental Figure S1. Electroretinogram results for patient UFC+7.74. Records shown here include Scotopic 0.01 (A), Scotopic 3.0 (B), Scotopic 3.0 Oscillatory Potentials (C), Photopic 3.0 (D), and Photopic Flicker [31 Hz] (E). Red lines represent right eye (OD) and blue lines represent left eye (OS). In all conditions, ERG responses were severely reduced or non-recordable.

Scotopic 0.01 ERG

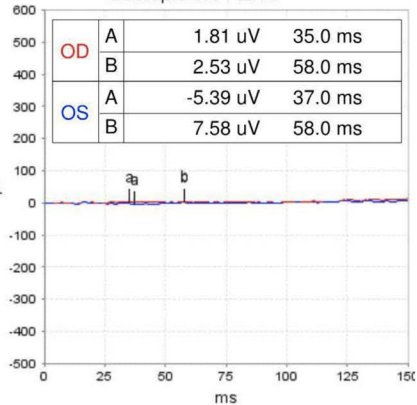

Scotopic 3.0 ERG

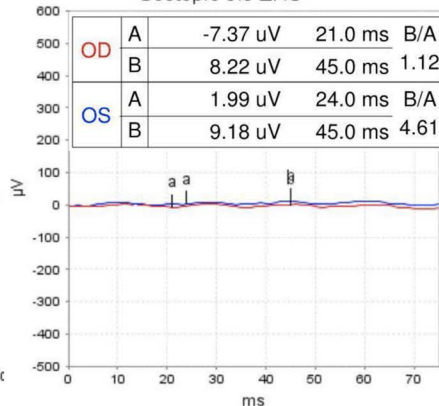

Scotopic 3.0 ERG Oscillatory Potentials

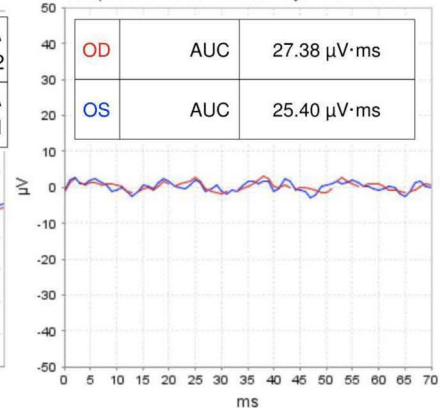

Photopic 3.0 ERG

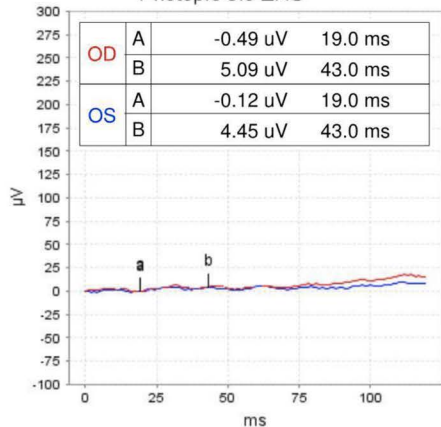

Photopic Flicker [31Hz]

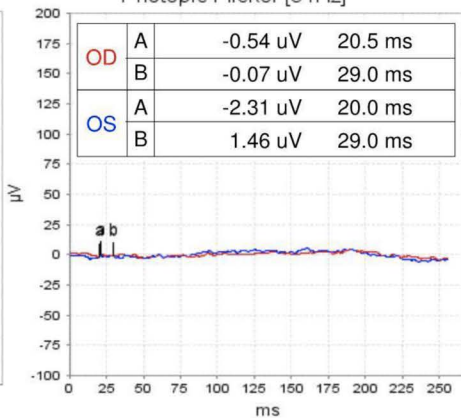

— OS  
— OD
